# Supplementary material
Source: Springer Nature journal article supplement (https://www.springermedizin.de/resource/supplementary/12889_2012_4768_MOESM6_ESM.pdf/9493712)
Supplement: MOESM6 [file 9493712]

### Days absent from day-care/school

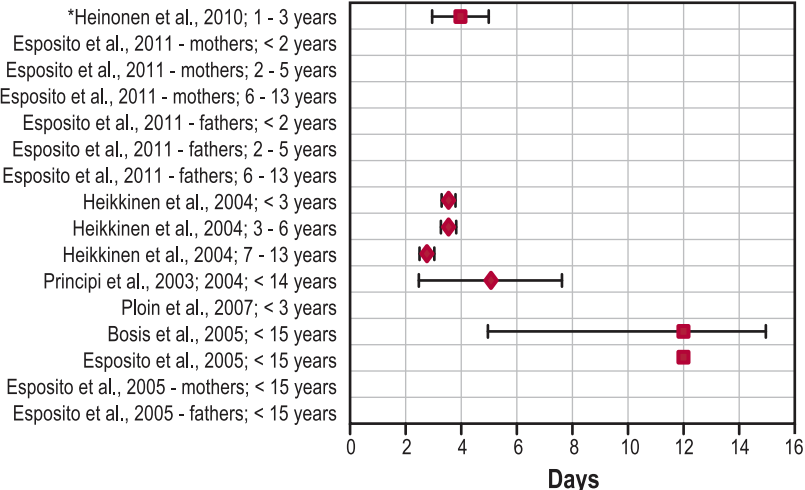

### Parental work days lost

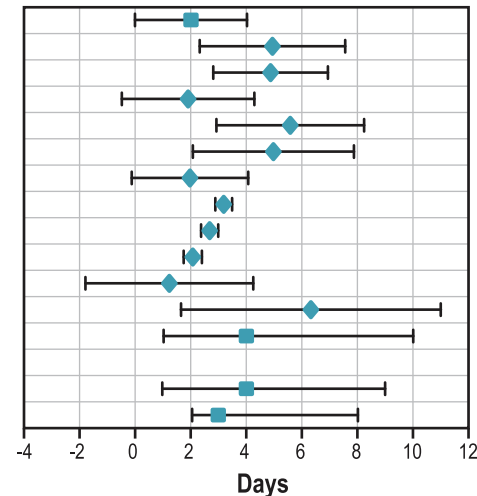

| Study                                        | Patient Age  | Influenza Cases   | Country | Setting             | Study Duration                                              |
|----------------------------------------------|--------------|-------------------|---------|---------------------|-------------------------------------------------------------|
| *Heinonen et al., 2010                       | 1 - 3 years  | 61                | Finland | Primary care        | 14 January - 9 April 2008 and 7 January - 26 March 2009     |
| Esposito et al., 2011 - mothers              | < 2 years    | 343 <sup>†</sup>  | Italy   | Primary care        | 1 November 2008 - 30 April 2009                             |
|                                              | 2 - 5 years  | 1071 <sup>†</sup> |         |                     |                                                             |
|                                              | 6 - 13 years | 729 <sup>†</sup>  |         |                     |                                                             |
| Esposito et al., 2011 - fathers              | < 2 years    | 343 <sup>†</sup>  | Italy   | Primary care        | 1 November 2008 - 30 April 2009                             |
|                                              | 2 - 5 years  | 1071 <sup>†</sup> |         |                     |                                                             |
|                                              | 6 - 13 years | 729 <sup>†</sup>  |         |                     |                                                             |
| Heikkinen et al., 2004                       | < 3 years    | 133 <sup>†</sup>  | Finland | Community           | 9 October 2000 -20 May 2001 and 1 October 2001 -19 May 2002 |
|                                              | 3 - 6 years  | 148 <sup>†</sup>  |         |                     |                                                             |
|                                              | 7 - 13 years | 91 <sup>†</sup>   |         |                     |                                                             |
| Principi et al., 2003, Principi et al., 2004 | < 14 years   | 352               | Italy   | Primary care and ED | 1 November 2001 - 30 April 2002                             |
| Ploin et al., 2007                           | < 3 years    | 283               | France  | Paediatric ED       | Weeks 3 to 6 in 2002                                        |
| Bosis et al., 2005                           | < 15 years   | 223               | Italy   | ED                  | 1 November 2002 - 31 March 2003                             |
| Esposito et al., 2005                        | < 15 years   | 234 <sup>†</sup>  | Italy   | ED                  | 1 November 2002 - 31 March 2003                             |
| Esposito et al., 2005 - mothers              | < 15 years   | 234 <sup>†</sup>  |         |                     |                                                             |
| Esposito et al., 2005 - fathers              | < 15 years   | 234 <sup>†</sup>  |         |                     |                                                             |
